# Supplementary material for: Heritability of the Human Infectious Reservoir of Malaria Parasites
Source: PubMed Central journal article supplement (PMC2894056; doi:10.1371/journal.pone.0011358), 2010-06-29
Supplement: pone.0011358.s004.pdf [file pone.0011358.s004.pdf]

Neuaid + Jocelyne

REPOBLIKAN'I MADAGASIKARA  
Tanindrazana – Fahafahana – Fandrosoana

MINISTERE DE LA SANTE  
ET DU PLANNING FAMILIAL

Le Ministre

N° 007 -SANPF/Le Ministre

AUTORISATION

Après consultation et avis favorable du Comité d'Ethique auprès du Ministère de la Santé, l'Institut Pasteur de Madagascar est autorisé à effectuer la recherche intitulée : «Etude multicentrique, randomisée, comparative, d'efficacité et de tolérance de 5 schémas thérapeutiques : chloroquine, amodiaquine, association fixe sulfadoxine + pyriméthamine, combinaison amodiaquine+association fixe sulfadoxine+pyrimethamine et combinaison artesunate+amodiaquine dans le traitement de l'accès palustre simple biologiquement confirmé à Plasmodium falciparum ».

Fait à Antananarivo, le 08 JAN. 2007

Le Ministre de la Santé et du Planning Familial

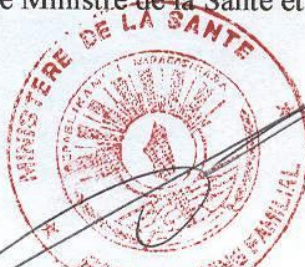

Dr. ROBINSON JEAN LOUIS
